# Supplementary material
Source: PubMed Central journal article supplement (PMC2662935)

ONLINE DATA SUPPLEMENT FOR:

## **$\beta$ -adrenergic Receptor Polymorphisms and Response to Salmeterol**

**Michael E. Wechsler<sup>1</sup>, MD, MMSc, Erik Lehman<sup>2</sup>, MS, Stephen C. Lazarus<sup>3</sup>, MD,  
Robert F. Lemanske, Jr.<sup>4</sup>, MD, Homer A. Boushey<sup>3</sup>, MD, Aaron Deykin<sup>1</sup>, MD, John  
V. Fahy<sup>3</sup>, MD, ChB, Christine A. Sorkness<sup>4</sup>, PharmD, Vernon M. Chinchilli<sup>2</sup>, PhD,  
Timothy J. Craig<sup>2</sup>, DO, Emily DiMango<sup>5</sup>, MD, Monica Kraft<sup>6</sup>, MD, Frank Leone<sup>7</sup>,  
MD, Richard J. Martin<sup>8</sup>, MD, Stephen P. Peters<sup>9</sup>, MD, PhD, Stanley J. Szefler<sup>8</sup>,  
MD, Wenlei Liu<sup>2</sup>, PhD and Elliot Israel<sup>1</sup>, MD for The National Heart, Lung, And  
Blood Institute's Asthma Clinical Research Network**

Online Repository Figure 1. AM Peak flow in subjects receiving albuterol regularly or as needed, stratified by B16 genotype, in the BAGS study<sup>6</sup>. The decline in AM PEF with albuterol in ARG/ARG subjects in the BAGS trial is remarkably similar to the response to salmeterol in the currently reported trial (From reference 6, Israel et al AJRCCM 2000)

Online repository table 1:

SOCS and SLIC Beta2-Adrenergic receptor polymorphism genotyping success rates

| B2 receptor Marker | Genotyping Success Rate |
|--------------------|-------------------------|
| C-709A             | 0.928                   |
| G-654A             | 0.899                   |
| C-47T              | 0.941                   |
| A+46G              | 0.872                   |
| C+79G              | 0.899                   |
| G+252A             | 0.848                   |
| C+491T             | 0.896                   |
| C+523A             | 0.920                   |

Online repository Table 2: AM PEF Change from baseline in both homozygote and heterozygote B16 subjects in SOCS and SLIC

| Outcomes                                                 | SOCS and SLIC Heterozygotes, change from baseline |         |                        |         |                        |         |                           |         |                         |         |
|----------------------------------------------------------|---------------------------------------------------|---------|------------------------|---------|------------------------|---------|---------------------------|---------|-------------------------|---------|
|                                                          | A/A                                               |         | G/G                    |         | A/G                    |         | A/A- A/G                  |         | G/G - A/G               |         |
|                                                          | Difference                                        | P-value | Difference             | P-value | Difference             | P-value | Difference                | P-value | Difference              | P-value |
| SOCS AM Peak Flow, L/min, week 22, compared with placebo | -29.90<br>(-58.47, -1.33)                         | 0.04    | 21.50<br>(-0.01, 43.0) | 0.05    | 18.18<br>(2.30, 34.06) | 0.03    | -48.08<br>(-80.77,-15.39) | 0.004   | 3.32<br>(-30.05, 23.42) | 0.81    |
| SLIC AM Peak Flow L/min, week 24                         | -18.41<br>(-55.8,18.9)                            | 0.33    | 17.79<br>(-3.6,39.2)   | 0.10    | 44.3<br>(25.0,63.6)    | <0.0001 | -62.71<br>(-104.8,-20.6)  | 0.004   | -26.51<br>(-55.4,2.3)   | 0.07    |

Online repository Figure 1

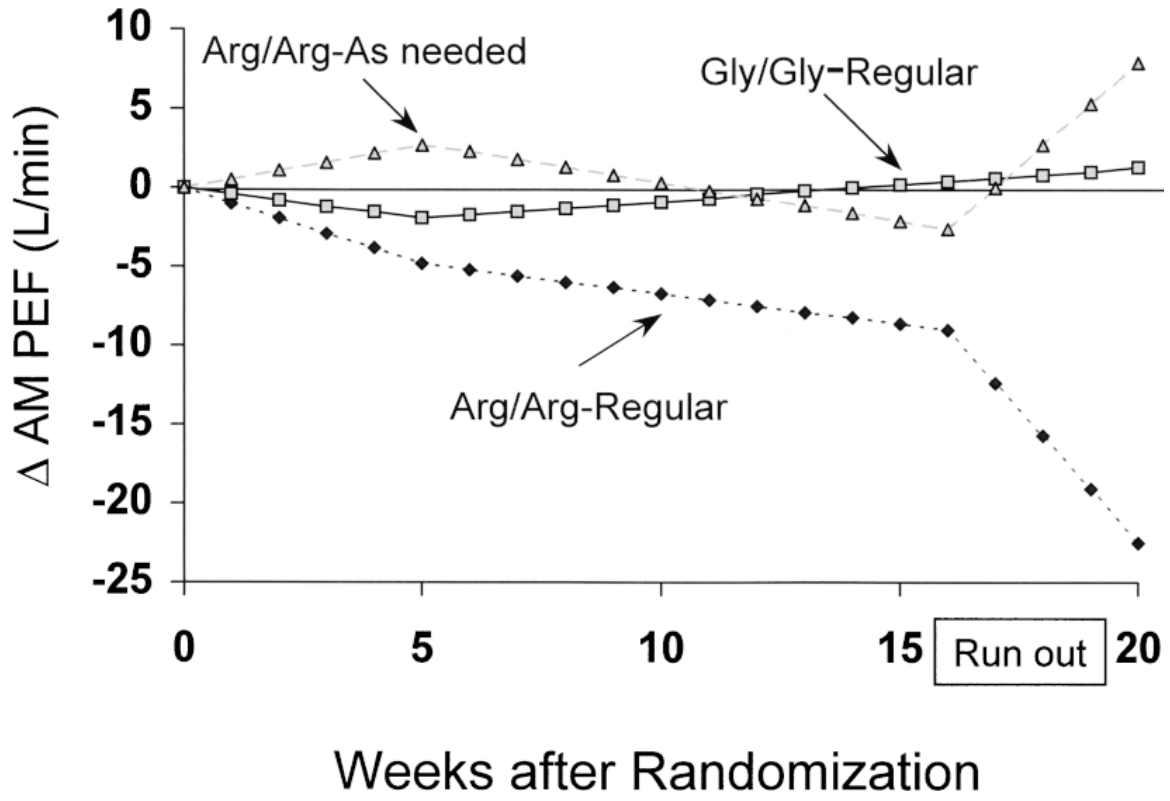

Supplement: supp_173_5_519__1.pdf [file supp_173_5_519__1.pdf]
